# Supplementary material
Source: publisher site journal article supplement (https://www.spandidos-publications.com/3502/downloadSupplementary)
Supplement: Supplementary file 1 [file downloadSupplementary]

Figure S1. Silencing of RHPN1-AS1 inhibits the viability of ovarian cancer cells. (A) The transfection efficiency of si-RHPN1-AS1 in ovarian cancer cells. (B) The cell viability was detected by CCK-8 assay in the ovarian cancer cells transfected with si-RHPN1-AS1. \* $P < 0.05$ , \*\* $P < 0.001$  compared with the blank control group. Blank, blank control. RHPN1-AS1, Rho GTPase binding protein 1 antisense RNA1.

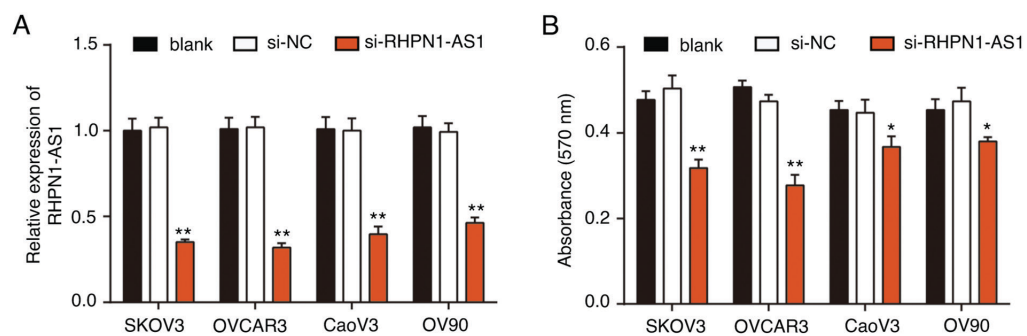

Figure S2. si-TOP2A inhibits the expression of TOP2A protein. \*\* $P < 0.001$  compared with the blank control group. Blank, blank control. *TOP2A*, DNA topoisomerase II $\alpha$ ; RHPN1-AS1, Rho GTPase binding protein 1 antisense RNA1.

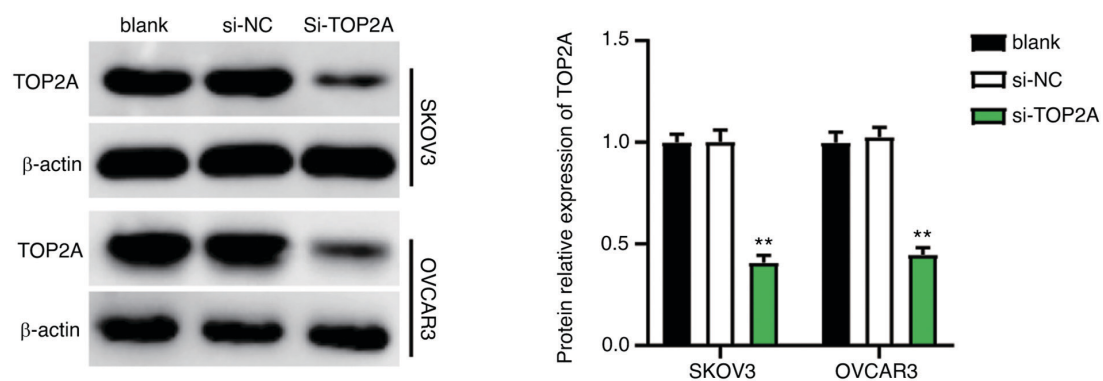

Table SI. Primer sequences of the RHPN1-AS1 silencing plasmids, miR-6884-5p inhibitor and TOP2A silencing plasmids.

| Name                                                                                            | Sequence (5'-3')      |
|-------------------------------------------------------------------------------------------------|-----------------------|
| si-lnc-F                                                                                        | GAACUACCUGUUUGUAGAACU |
| si-lnc-R                                                                                        | UUCUACAAACAGGUAGUUCUG |
| miR-6884-5p inhibitor                                                                           | GCCCAUCACCUUCCGUCUCUC |
| si-RNA-F                                                                                        | GGUGUUGGAUUAUCUAAGAGA |
| si-RNA-R                                                                                        | UCUUAGAAUAUCCAACACCGU |
| F, forward; R, reverse; si-lnc, RHPN1-AS1 silencing plasmids; si-RNA, TOP2A silencing plasmids. |                       |
